# Supplementary material
Source: PubMed Central journal article supplement (PMC384773)

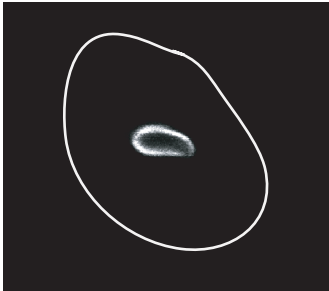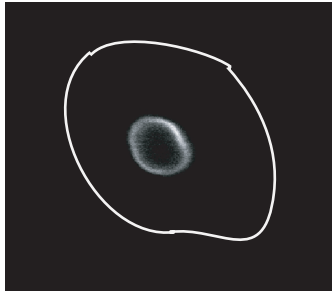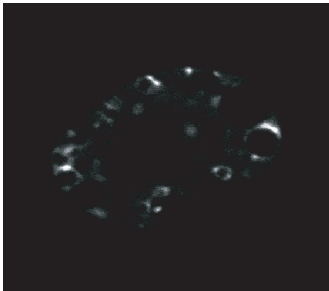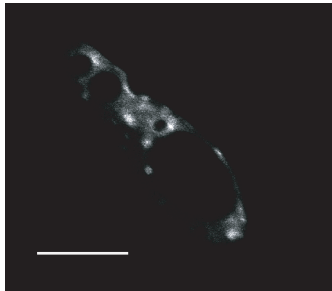

Supplement: pnas_101_13_4483__2.pdf [file pnas_101_13_4483__2.pdf]
